# Supplementary material
Source: PubMed Central journal article supplement (PMC5563585)
Supplement: IAI.00239-17_zii999092134s1.pdf [file IAI.00239-17_zii999092134s1.pdf]

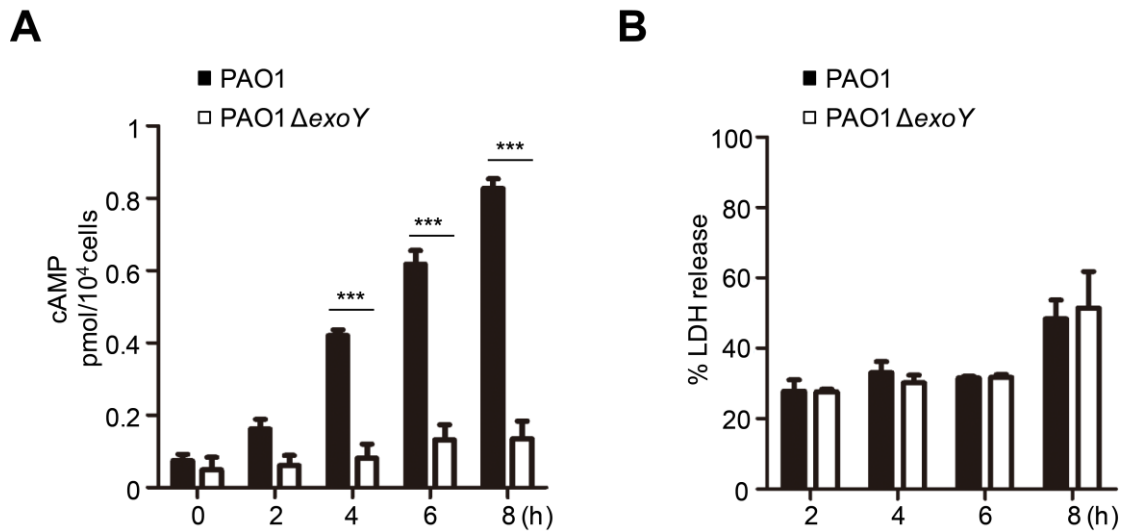

**Fig. S1** ExoY has no cytotoxic effect on epithelial cells.

(A) cAMP level in A549 cells infected with PAO1 or PAO1  $\Delta$ exoY for 0 to 8 h, MOI=2. (B) Analysis of LDH-release-based cell death of A549 cells infected with PAO1 or PAO1  $\Delta$ exoY at the indicated times, MOI=10. Data are expressed as mean values  $\pm$  s.e.m (A) or mean values  $\pm$  s.d. (B) from three technical replicates. \*\*\*,  $p < 0.001$ . Data shown are representative of three independent experiments.

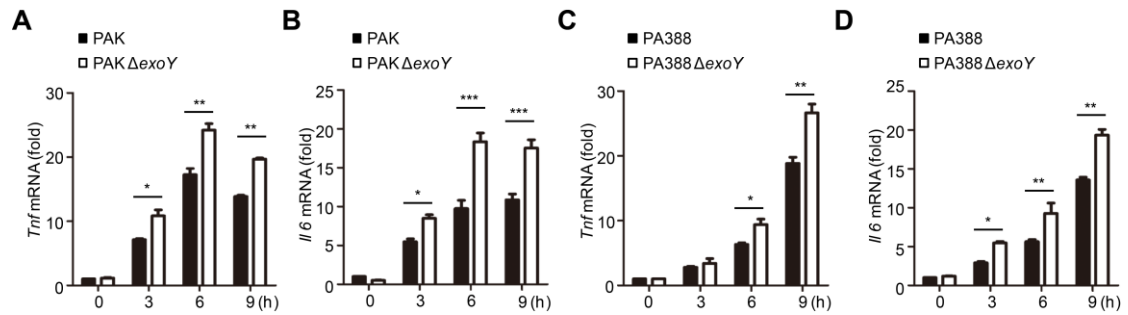

**Fig. S2** *ExoY* inhibits cytokine production in epithelial cells.

(A and B) qPCR analysis of *Tnf* or *Il-6* mRNA in A549 cells infected with PAK or PAK  $\Delta$ *exoY* for 0 to 9 h. (C and D) qPCR analysis of *Tnf* or *Il-6* mRNA in A549 cells infected with PA388 or PA388  $\Delta$ *exoY* for 0 to 9 h. MOI=10 in A-D. (A-D) are expressed as mean values  $\pm$  s.d. from three technical replicates. \*,  $p < 0.05$ , \*\*,  $p < 0.01$ , \*\*\*,  $p < 0.001$ . Data shown are representative of three independent experiments.

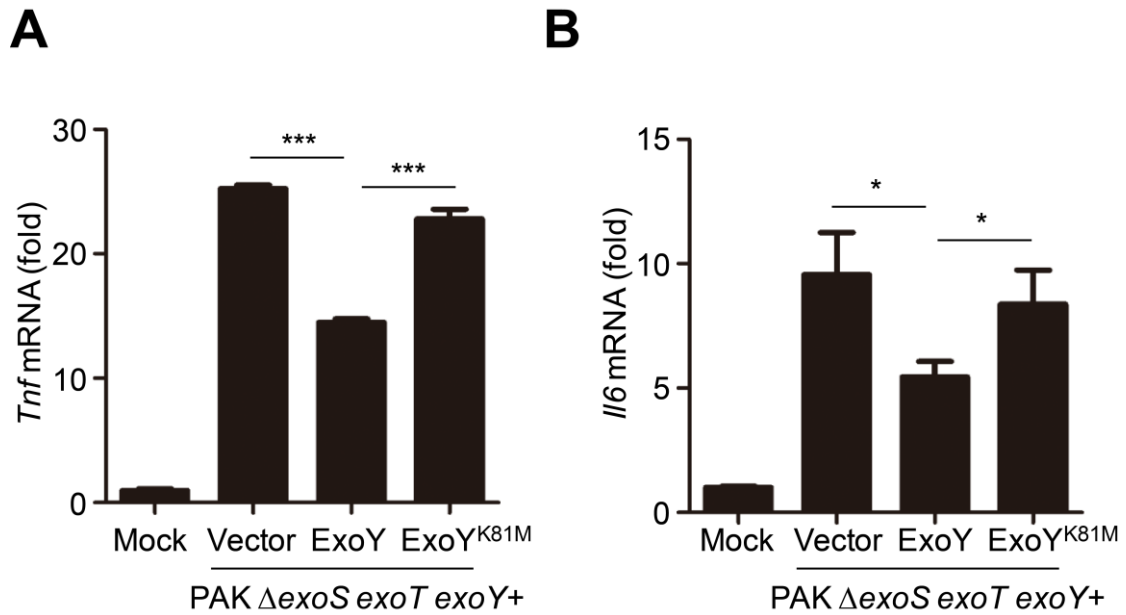

**Fig. S3 The inhibitory effect of ExoY on cytokine production is dependent on nucleotidyl cyclase activity.**

(A and B) qPCR analysis of *Tnf* or *Il6* mRNA in A549 cells infected with PAK  $\Delta$ exoS exoT exoY(pUCP19), PAK  $\Delta$ exoS exoT exoY(pUCPexoY) or PAK  $\Delta$ exoS exoT exoY(pUCPexoY<sup>K81M</sup>) for 6 h. MOI=10 in A and B. (A and B) are expressed as mean values  $\pm$  s.d. from three technical replicates. \*,  $p < 0.05$ , \*\*\*,  $p < 0.001$ . Data shown are representative of two independent experiments.

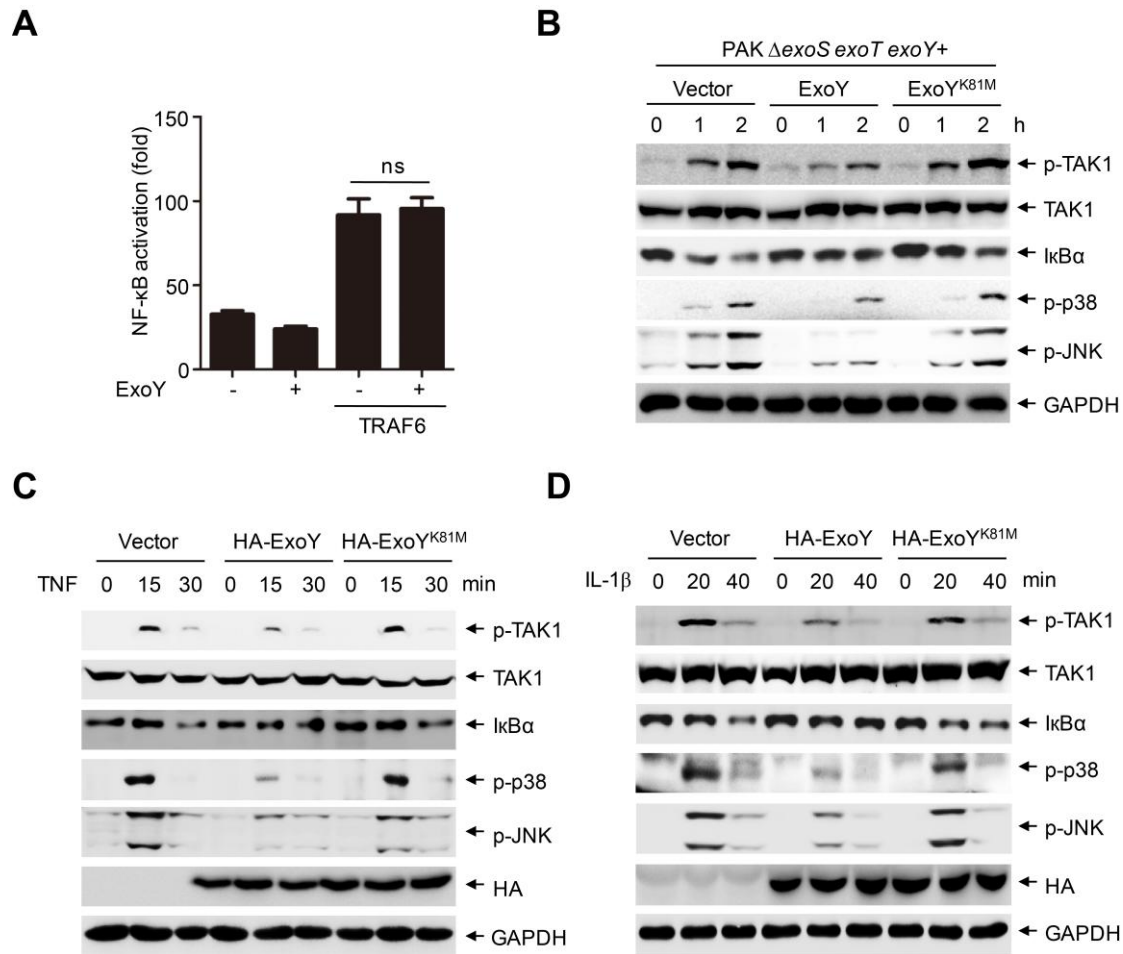

**Fig. S4 ExoY suppresses the activation of TAK1.**

(A) Luciferase assay of NF- $\kappa$ B reporter activation in HEK293T cells transfected with various plasmids. (B) IB of lysates from A549 cells infected with PAK  $\Delta$ exoS exoT exoY(pUCP19), PAK  $\Delta$ exoS exoT exoY(pUCPexoY) or PAK  $\Delta$ exoS exoT exoY (pUCPexoY<sup>K81M</sup>) at the indicated times, MOI=10. (C) IB of lysates from HEK293T cells transfected with various plasmids, and stimulated with TNF (10ng/ml) at the indicated times. (D) IB of lysates from A549 cells transfected with various plasmids, and stimulated with IL-1 $\beta$  (10 ng/ml) at the indicated times. A is expressed as mean values  $\pm$  s.d. from three technical replicates. ns, non-significant. Data shown are representative of three independent experiments (A) or two independent experiments (B-D).

**A**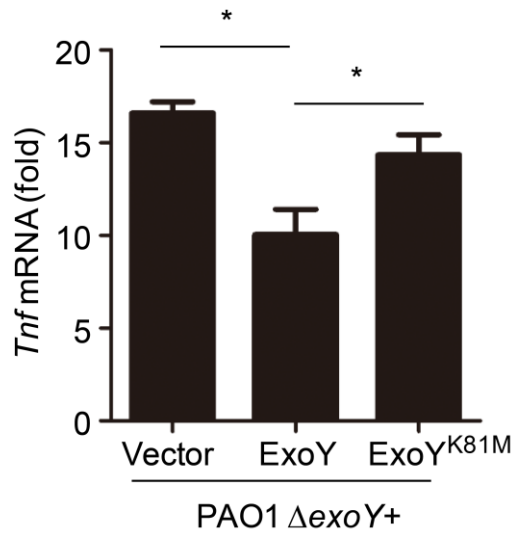**B**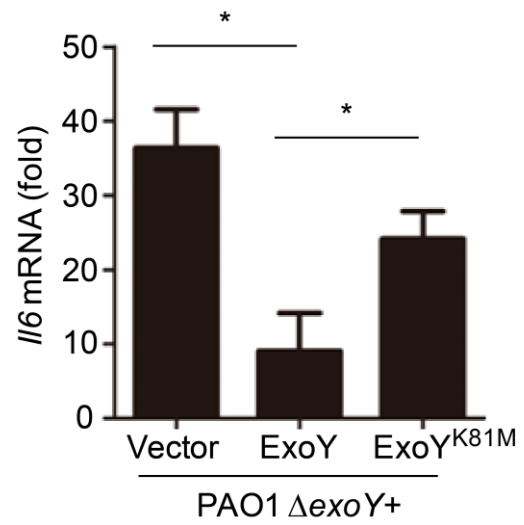

**Fig. S5 The inhibitory effect of ExoY on cytokine production is dependent on nucleotidyl cyclase activity in mice.**

(**A** and **B**) qPCR analysis of *Tnf* or *Il6* mRNA in lung tissues from mice infected with  $1 \times 10^6$  CFU of PAO1  $\Delta$ *exoY*(pUCP19), PAO1  $\Delta$ *exoY*(pUCP*exoY*) or PAO1  $\Delta$ *exoY*(pUCP*exoY*<sup>K81M</sup>) for 2 days. n=5 per group. (**A** and **B**) are expressed as mean values  $\pm$  s.d. from five mice per group. \*,  $p < 0.05$ . Data shown are representative of at least three independent experiments.
